# Supplementary material for: Genomic diversity and phylogeography of norovirus in China
Source: PubMed Central journal article supplement (PMC5629611; doi:10.1186/s12920-017-0287-9), 2017-10-03

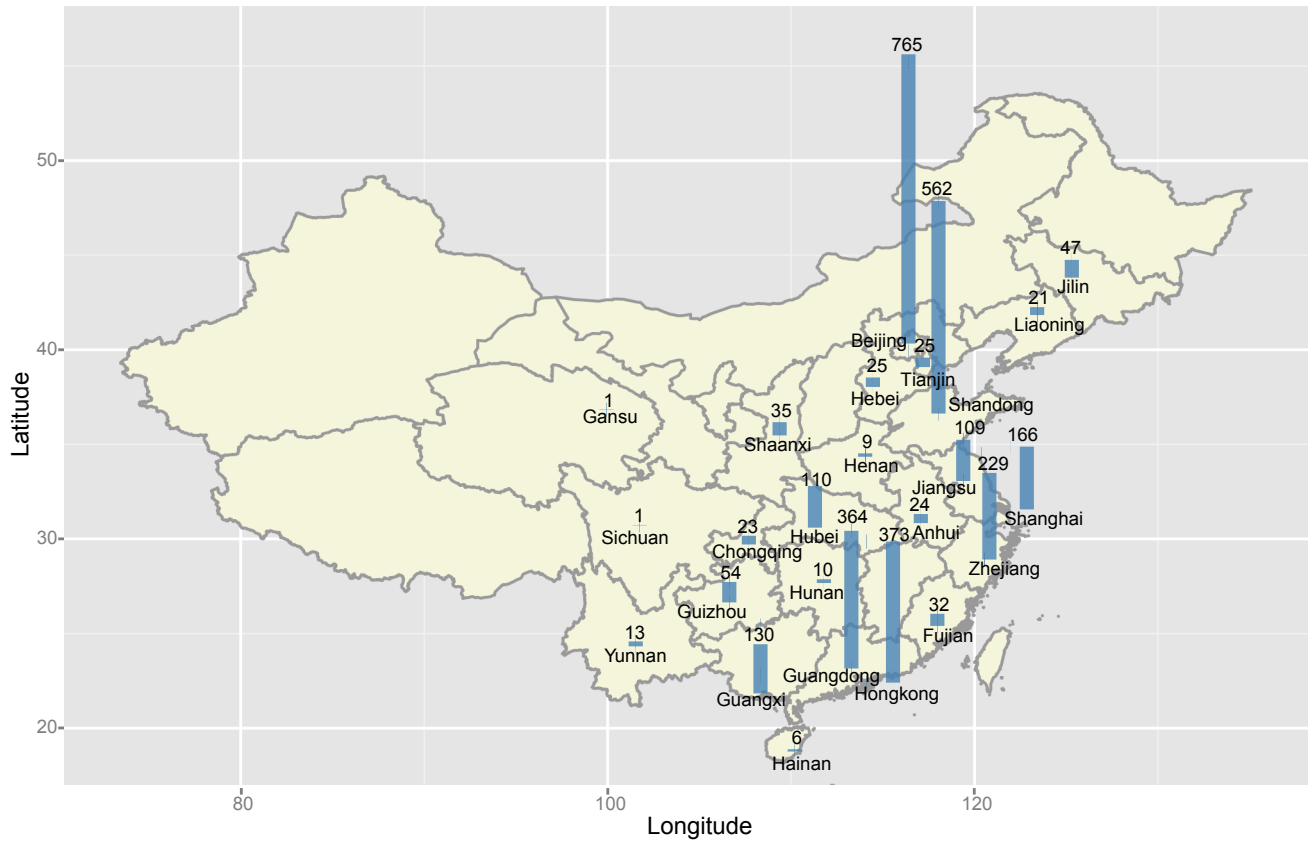

Supplement: 12920_2017_287_MOESM2_ESM.pdf [file 12920_2017_287_MOESM2_ESM.pdf]
